# Supplementary material
Source: PubMed Central journal article supplement (PMC4066498)
Supplement: 1400514111_pnas.201400514SI.pdf [file 1400514111_pnas.201400514SI.pdf]

# Supporting Information

Kovács-Bogdán et al. 10.1073/pnas.1400514111

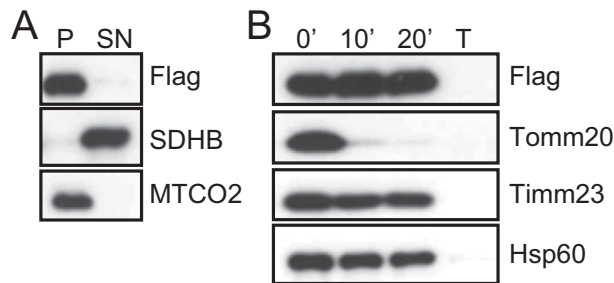

**Fig. S1.** Expression, localization, and topology of the DIME motif mutant of the *D. discoideum* mitochondrial calcium uniporter, DdMCU(AIIA), in HEK-293T MCU KO cells. (A) Carbonate extraction of mitochondria isolated from DdMCU(AIIA) expressing HEK-293T MCU KO cells. P, pellet, SN, supernatant fractions; SDHB, succinate dehydrogenase subunit B, peripheral membrane protein control; MTCO2, cytochrome c oxidase subunit II, membrane protein control. (B) Protease K treatment of mitoplasts from DdMCU(AIIA) expressing HEK-293T MCU KO cells. Tomm20, Timm23, and Hsp60 are mitochondrial outer membrane, inner membrane, and matrix protein controls, respectively. T, pretreatment with 1% Triton X-100. 0', 10', and 20' indicate the duration of incubation with proteasease K.

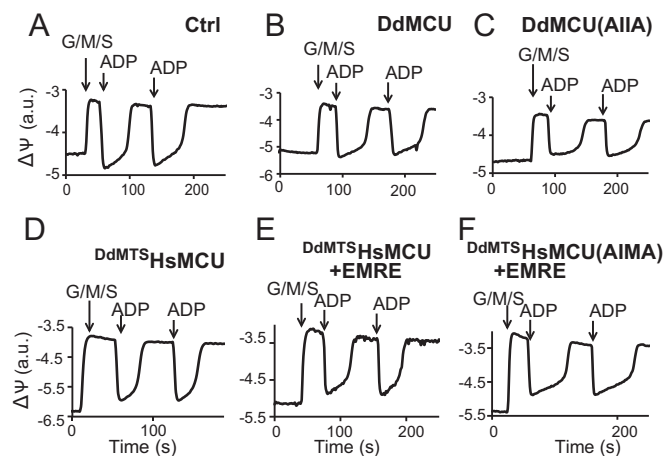

**Fig. S2.** Membrane potential measurements of yeast mitochondria. Representative traces show membrane potential ( $\Delta\Psi$ , TMRM fluorescence) measurements in isolated yeast mitochondria from control (Ctrl) (A) and DdMCU-expressing (B), DdMCU(AIIA)-expressing (C), DdMTS<sup>HsMCU</sup>-expressing (D), DdMTS<sup>HsMCU</sup> + EMRE-expressing (E), and DdMTS<sup>HsMCU(AIIA)</sup> + EMRE-expressing (F) cells during the addition of 10 mM glutamate, malate, and succinate (G/M/S) respiratory substrates and 0.3 nmol ADP. EMRE, essential MCU regulator.

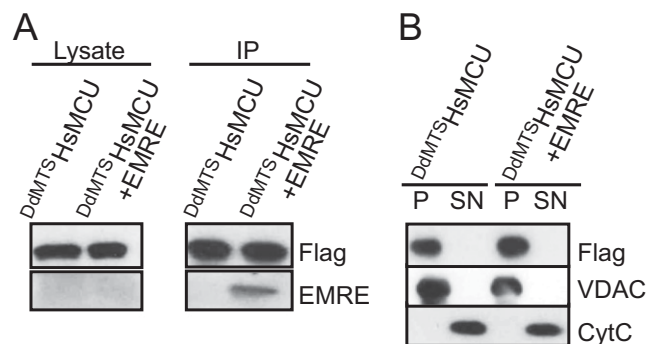

**Fig. S3.** Expression of EMRE and membrane localization of HsMCU in yeast cells. (A) Coimmunoprecipitation of HsMCU and EMRE using the FLAG tag fused to DdMTS<sup>HsMCU</sup>. (B) Carbonate extraction of mitochondria isolated from yeast cells expressing DdMTS<sup>HsMCU</sup> or DdMTS<sup>HsMCU</sup> + EMRE. VDAC and cytochrome c (CytC) are mitochondrial membrane and soluble protein controls, respectively.
